# Supplementary material for: OPAQUE3, encoding a transmembrane bZIP transcription factor, regulates endosperm storage protein and starch biosynthesis in rice
Source: PubMed Central journal article supplement — Plant Commun. 2022 Oct 18;3(6):100463. doi: 10.1016/j.xplc.2022.100463 (PMC9700205; doi:10.1016/j.xplc.2022.100463), 2022-10-18
Supplement: mmc1.pdf [file mmc1.pdf]

**Plant Communications, Volume 3**

**Supplemental information**

***OPAQUE3*, encoding a transmembrane bZIP transcription factor, regulates endosperm storage protein and starch biosynthesis in rice**

**Ruijie Cao, Shaolu Zhao, Guiai Jiao, Yingqing Duan, Liuyang Ma, Nannan Dong, Feifei Lu, Mingdong Zhu, Gaoneng Shao, Shikai Hu, Zhonghua Sheng, Jian Zhang, Shaoqing Tang, Xiangjin Wei, and Peisong Hu**

***Supplemental Information:***

***OPAQUE3, encoding a transmembrane bZIP transcription factor, regulates endosperm storage protein and starch biosynthesis in rice***

Ruijie Cao<sup>1,3</sup>, Shaolu Zhao<sup>1,2,3</sup>, Guiai Jiao<sup>1</sup>, Yingqing Duan<sup>1</sup>, Liuyang Ma<sup>1</sup>, Nannan Dong<sup>1</sup>, Feifei Lu<sup>1</sup>, Mingdong Zhu<sup>1</sup>, Gaoneng Shao<sup>1</sup>, Shikai Hu<sup>1</sup>, Zhonghua Sheng<sup>1</sup>, Jian Zhang<sup>1</sup>, Shaoqing Tang<sup>1</sup>, Xiangjin Wei<sup>1,\*</sup>, Peisong Hu<sup>1,\*</sup>

<sup>1</sup> State Key Laboratory of Rice Biology, China National Center for Rice Improvement, China National Rice Research Institute, Hangzhou, 310006, China

<sup>2</sup> Institute of Agricultural Science in Jiangsu Coastal Areas, Yancheng, 224002, China

<sup>3</sup> These authors contributed equally to this work.

\* Correspondence: Xiangjin Wei (weixiangjin@caas.cn), Peisong Hu (peisonghu@126.com, [hupeisong@caas.cn](mailto:hupeisong@caas.cn))

**Supplemental Figures 1-14**

**Supplemental Tables 1**

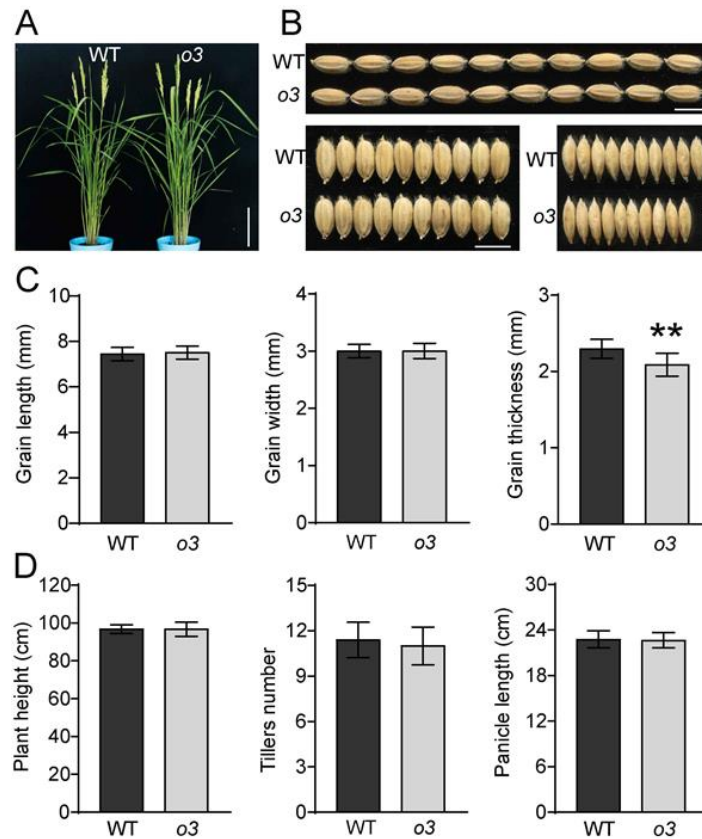

**Figure S1. Characteristics of wild type (WT) and *o3* mutant.**

**(A)** The plant phenotype of WT and *o3* after heading.

**(B, C)** The morphology **(B)** and Statistics **(C)** of grain length, grain width and grain thickness of WT and *o3* (n=200). Scale bars, 20 cm in **(A)**; 6mm in **(B)**.

**(D)** Plant height, tiller number and panicle length of WT and *o3*. Values are means  $\pm$ SD from three biological replicates, not less than 10 plants in each replication. The asterisks indicate statistical significance compared with the wild type, as determined by Student's *t*-test (\*\*,  $P < 0.01$ ).

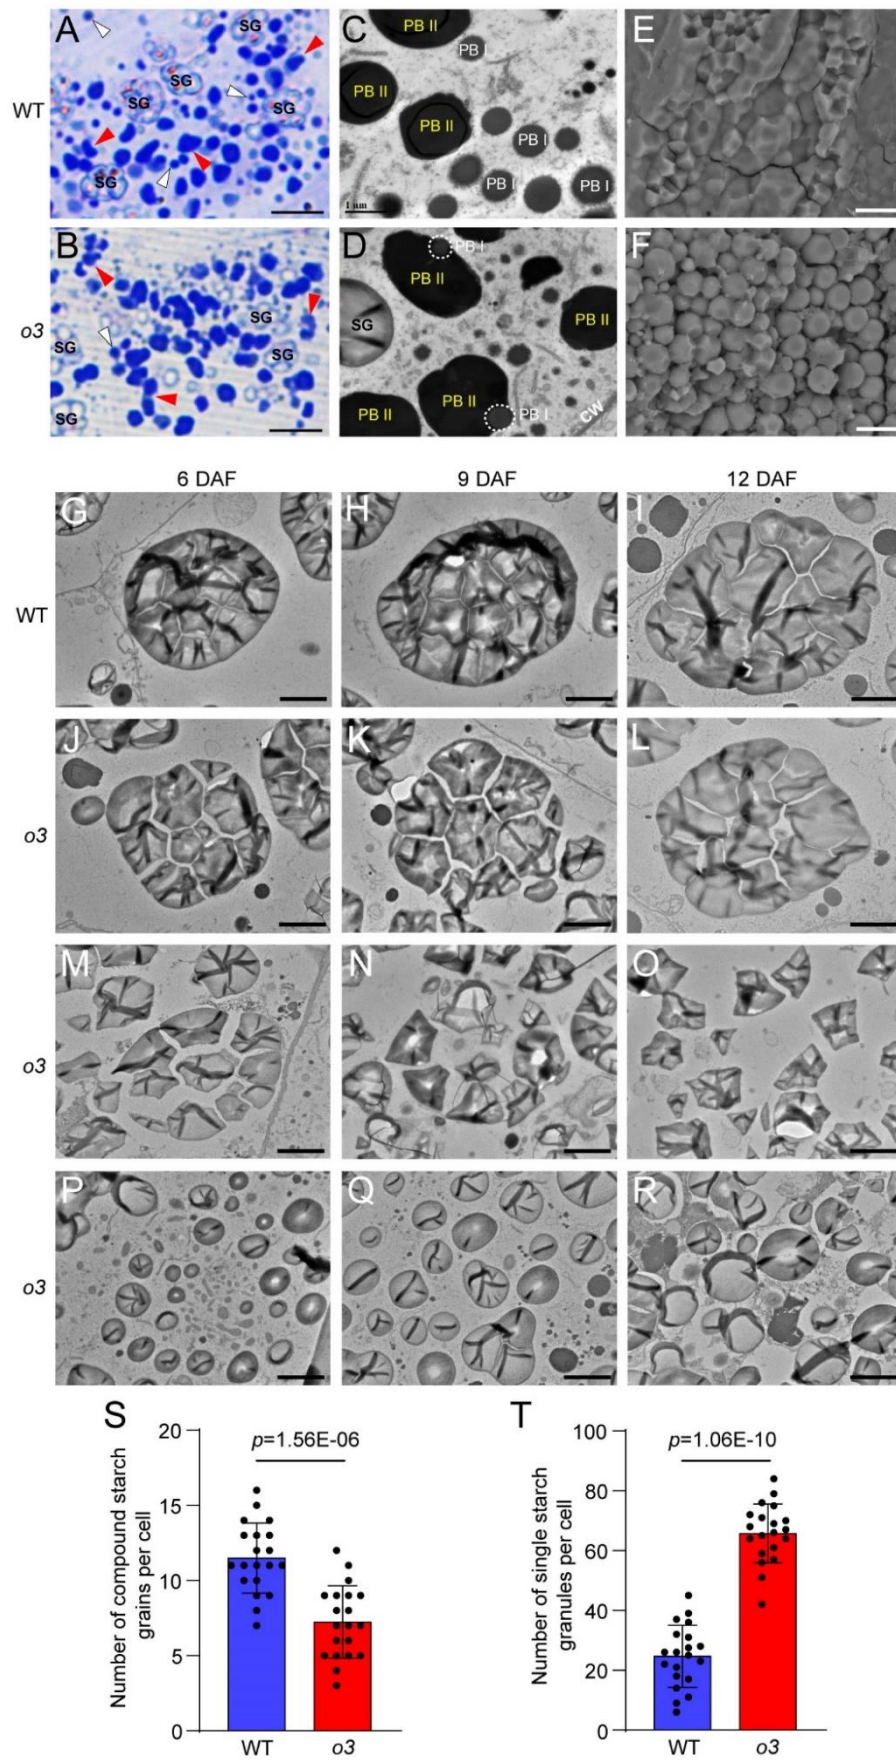

**Figure S2.** The morphology of protein body and starch granule in developing endosperm cells of wild type and *o3*.

**(A, B)** Semi-thin sections stained with Coomassie blue showing the morphology of PB I and PB II of WT and *o3* endosperm at 12 DAF. White arrowhead denotes PB I, red arrowhead denotes PB II; SG, starch granule. Scale bars, 20 $\mu$ m.

**(C, D)** Transmission electron microscopy showing the structure of PBI and PBII of WT and *o3* endosperm, White dotted line indicates the abnormal infusion of PBI and PBII. CW, cell wall. Scale bars, 1 $\mu$ m.

**(E, F)** Scanning electron microscopy images of transverse sections of mature grains of WT and *o3*. Scale bars, 10 $\mu$ m.

**(G-I)** Transmission electron microscopy (TEM) showed the well-developed amyloplast in WT endosperm cells at 6 DAF (**G**), 9 DAF (**H**), and 12 DAF (**I**). Scale bars, 2  $\mu$ m.

**(J-L)** Few well-developed amyloplast were observed in *o3* endosperm cells at 6 DAF (**J**), 9 DAF (**K**) and 12 DAF (**L**). Scale bars, 2  $\mu$ m.

**(M-O)** The amyloplasts were gradually disintegrated in *o3* endosperm cells from 6 DAF (**M**) to 9 DAF (**N**) and 12 DAF (**O**). Scale bars, 2  $\mu$ m.

**(P-R)** Single and dispersive starch granules in *o3* endosperm cells at 6 DAF (**P**), 9 DAF (**Q**), and 12 DAF (**R**). Scale bars, 2  $\mu$ m.

**(S, T)** Statistics of the number of starch compound grains and single granules in central endosperm cells of WT and *o3* at 9 DAF. Data are means  $\pm$  SD from at least three biological replicates. Statistically significant differences were determined using Student's *t*-test. *P*-values are shown when statistically significant.

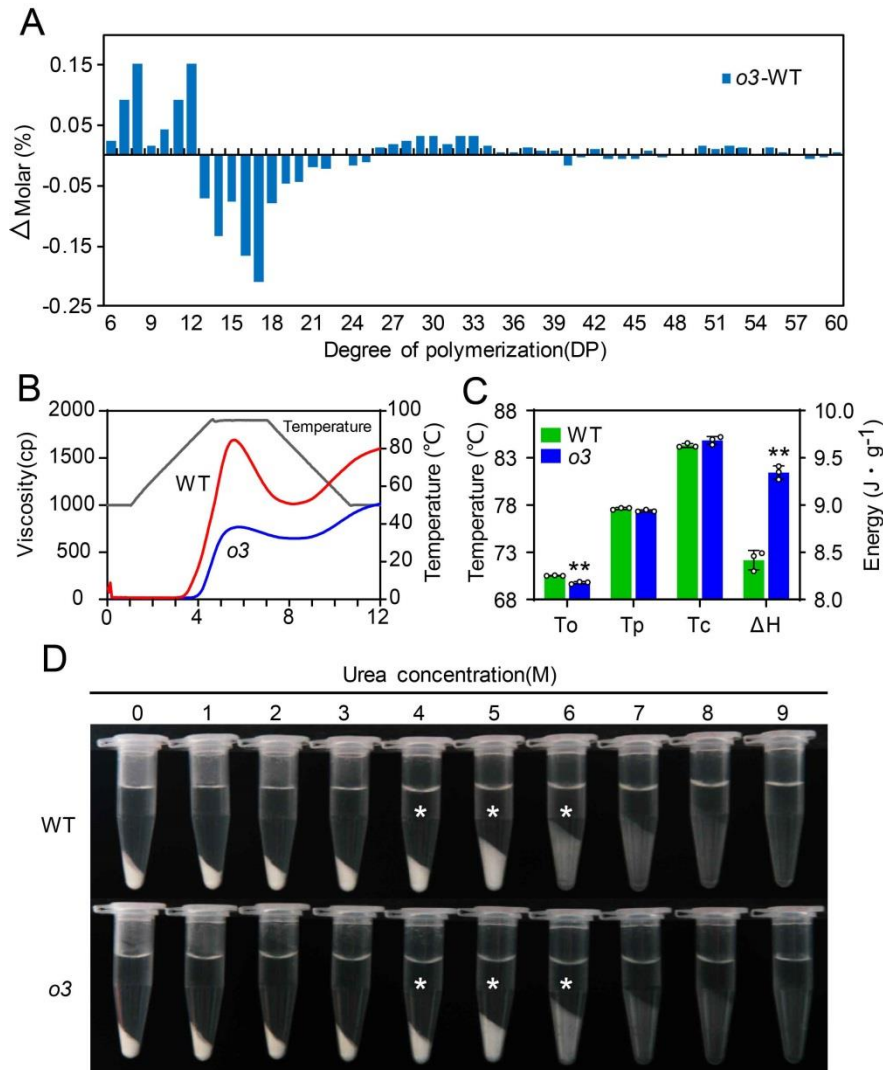

**Figure S3. Starch physicochemical characteristics in the *o3* mutant.**

(A) Differences in the amylopectin chain length distributions between the WT and *o3*.

(B) Pasting properties analyzing with a rapid visco analyzer (RVA) of endosperm starch of WT (red line) and *o3* (blue line). The viscosity value at each temperature is the average of three replicates. The gray line indicates the temperature changes during the measurements.

(C) Gelatinization temperature of endosperm starch. To, Tp, and Tc represent the onset, peak, and conclusion gelatinization temperatures, respectively. All data are presented as means  $\pm$ SD from three replicates. Statistically significant differences were determined using Student's *t*-test (\*\*,  $P < 0.01$ ).

(D) Gelatinization characteristics of starch from *o3* mutant seeds. Starch powder was mixed with different concentrations (1~9 M) of urea solution. The most significant difference was observed for 4~6 M urea (indicated by \*).

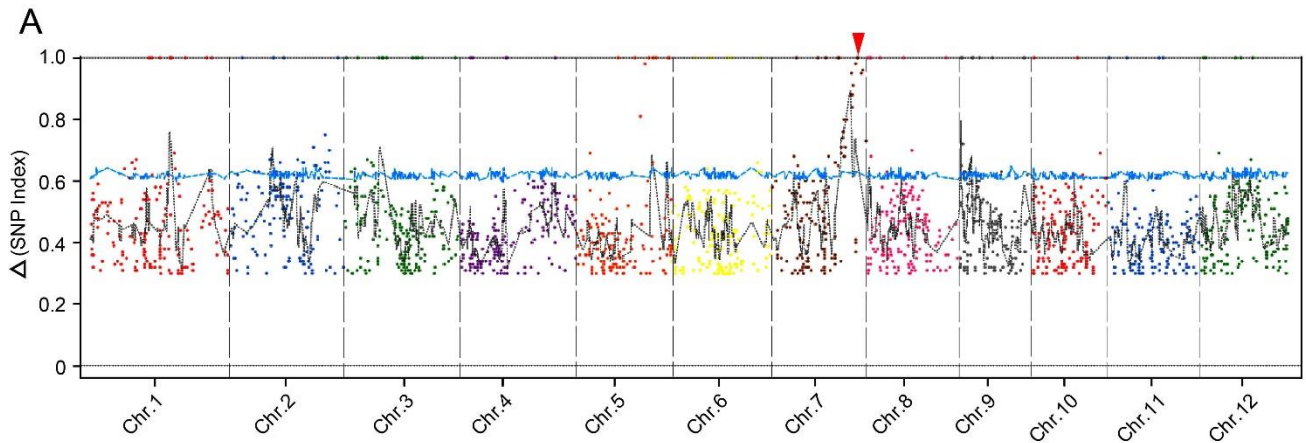

**B**

| SNP         | Position        | Genotype      | $\Delta$ (SNP-index) | Variant                  | Gene                  | Description                           |
|-------------|-----------------|---------------|----------------------|--------------------------|-----------------------|---------------------------------------|
| SNP1        | 26610760        | C to T        | 1                    | synonymous SNV           | LOC_Os07g44560        | AMP-binding domain containing protein |
| <b>SNP2</b> | <b>26810333</b> | <b>T to C</b> | <b>1</b>             | <b>nonsynonymous SNV</b> | <b>LOC_Os07g44950</b> | <b>bZIP transcription factor</b>      |
| SNP3        | 26108114        | C to T        | 0.98                 | intronic                 | LOC_Os07g43610        | hypothetical protein                  |
| SNP4        | 28371212        | C to T        | 0.96                 | upstream                 | LOC_Os07g47460        | expressed protein                     |
| SNP5        | 24796636        | C to T        | 0.95                 | intronic                 | LOC_Os07g41380        | retrotransposon protein               |
| SNP6        | 27900815        | C to T        | 0.95                 | intronic                 | LOC_Os07g46680        | expressed protein                     |
| SNP7        | 25293558        | C to T        | 0.91                 | splicing                 | LOC_Os07g42260        | OsPAA2                                |
| SNP8        | 24593986        | T to C        | 0.88                 | intronic                 | LOC_Os07g41090        | HDA713                                |
| SNP9        | 25101693        | C to T        | 0.88                 | intronic                 | LOC_Os07g41900        | expressed protein                     |
| SNP10       | 24969228        | T to A        | 0.84                 | upstream                 | LOC_Os07g41660        | expressed protein                     |
| SNP11       | 20252223        | T to C        | 0.81                 | intergenic               | LOC_Os05g34210        | expressed protein                     |
| SNP12       | 23272328        | G to A        | 0.8                  | upstream                 | LOC_Os07g38780        | transposon protein                    |
| SNP13       | 22518789        | C to T        | 0.8                  | dow nstream              | LOC_Os07g37580        | diacylglycerol kinase                 |

**Figure S4. Mut-map cloning of *O3*.**

**(A)** Distribution of progeny  $\Delta$ (SNP-index) on chromosomes of the whole genome generated using Mut-map method. The black curves represent SNP-index plot regression lines; red arrowhead indicates the SNP located on candidate gene.

**(B)** The annotation of 13 candidate SNPs on chromosome 7 with SNP-index more than 0.8. The candidate SNP was shown in red format.

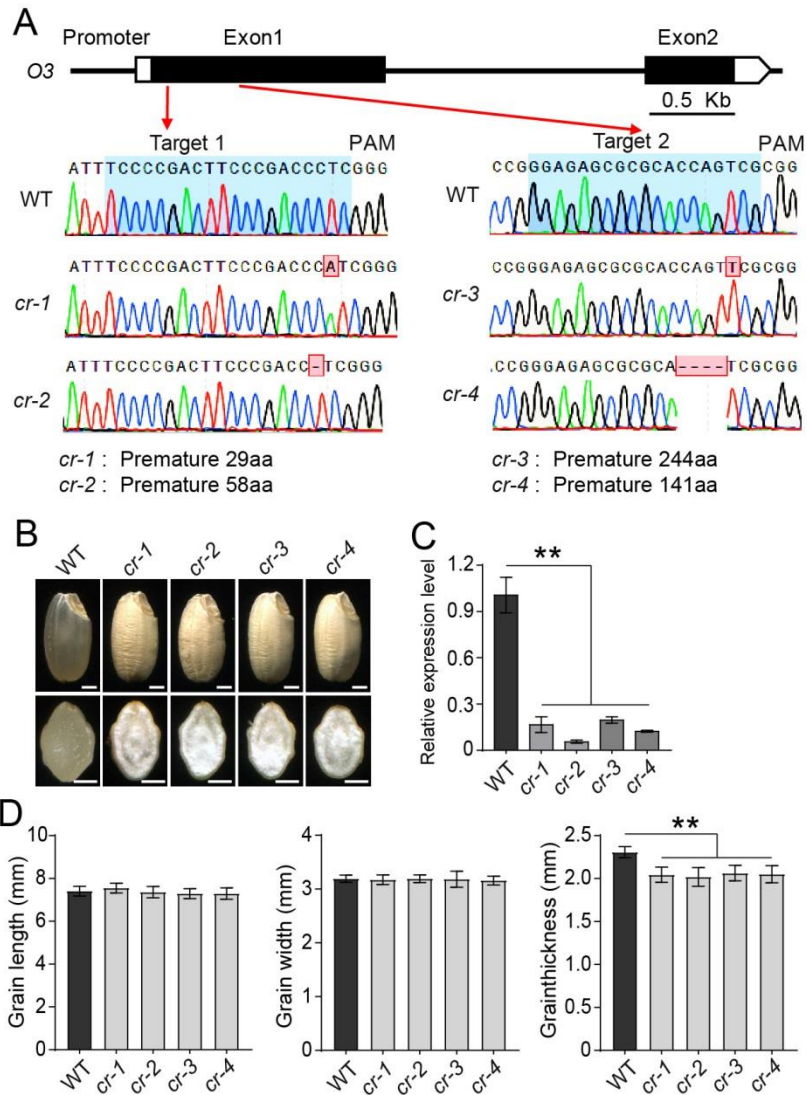

**Figure S5. Analysis of CRISPR/Cas9 mediated editing lines of *O3*.**

**(A)** Gene structure of *O3* and sequencing of CRISPR/Cas9 target region in WT and T<sub>0</sub> plants. Scale bars, 0.5 kb.

**(B)** Appearance and transverse sections of mature seeds of wild type and *O3* knock out plants (*cr-1*~*cr-4*). Scale bars, 1mm.

**(C)** Relative expression level of *O3* in transgenic knock out plants (*cr-1*~*cr-4*).

**(D)** The grain length, grain width and grain thickness of brown rice of wild type and *O3* knock out plants (*cr-1*~*cr-4*).

Data in **(C-D)** are shown as mean  $\pm$  SD from three biological replicates. Asterisks indicate statistical significance as determined by Student's *t*-test (\*\* $P < 0.01$ ).



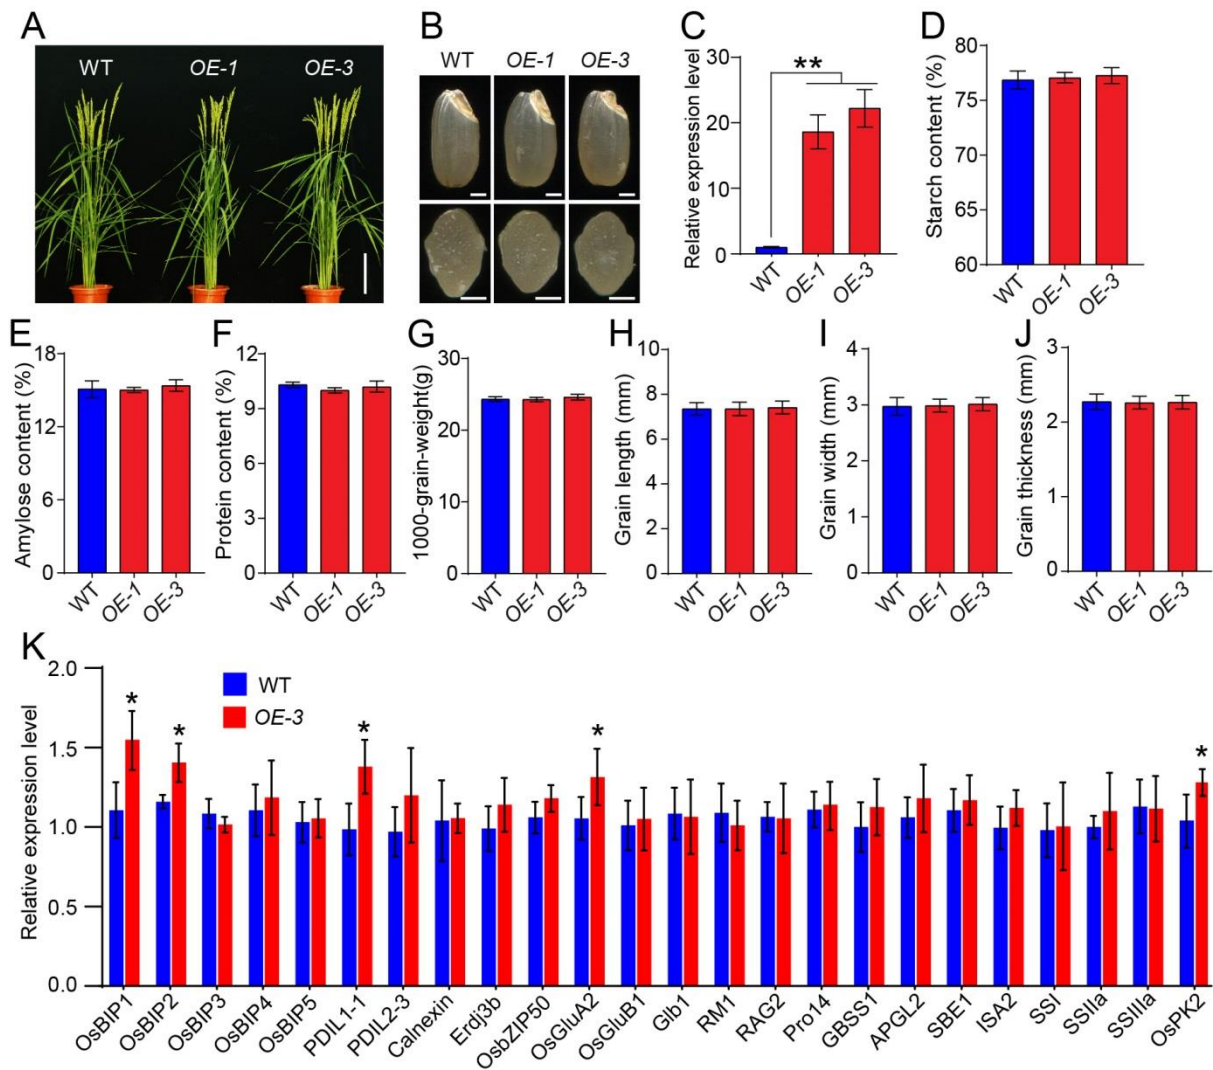

**Figure S6. Analysis of overexpression lines of *O3* in WT background.**

(A) The plant phenotype of WT and transgenic overexpression plants in WT background (*OE-1* and *OE-3*) after heading. Scale bar, 20 cm.

(B) Appearance and transverse sections of mature grains of WT, *OE-1* and *OE-3* plants. Scale bars, 1mm.

(C) Relative expression level of *O3* in *OE-1* and *OE-3*.

(D-G) The total starch (D), amylose (E), and total protein (F) content in endosperm, and 1000-grain-weight (G) of WT, *OE-1* and *OE-3*.

(H-J) The grain length (H), grain width (I) and grain thickness (J) of brown rice of WT, *OE-1* and *OE-3*.

(K) RT-qPCR analysis of genes related to ER stress, and genes related to starch and protein biosynthesis in WT and *O3 OE* lines.

Data in (C-K) are shown as mean  $\pm$  SD from three biological replicates, respectively. Asterisks indicate statistical significance as determined by a Student's *t*-test (\* $P < 0.05$ , \*\* $P < 0.01$ ).

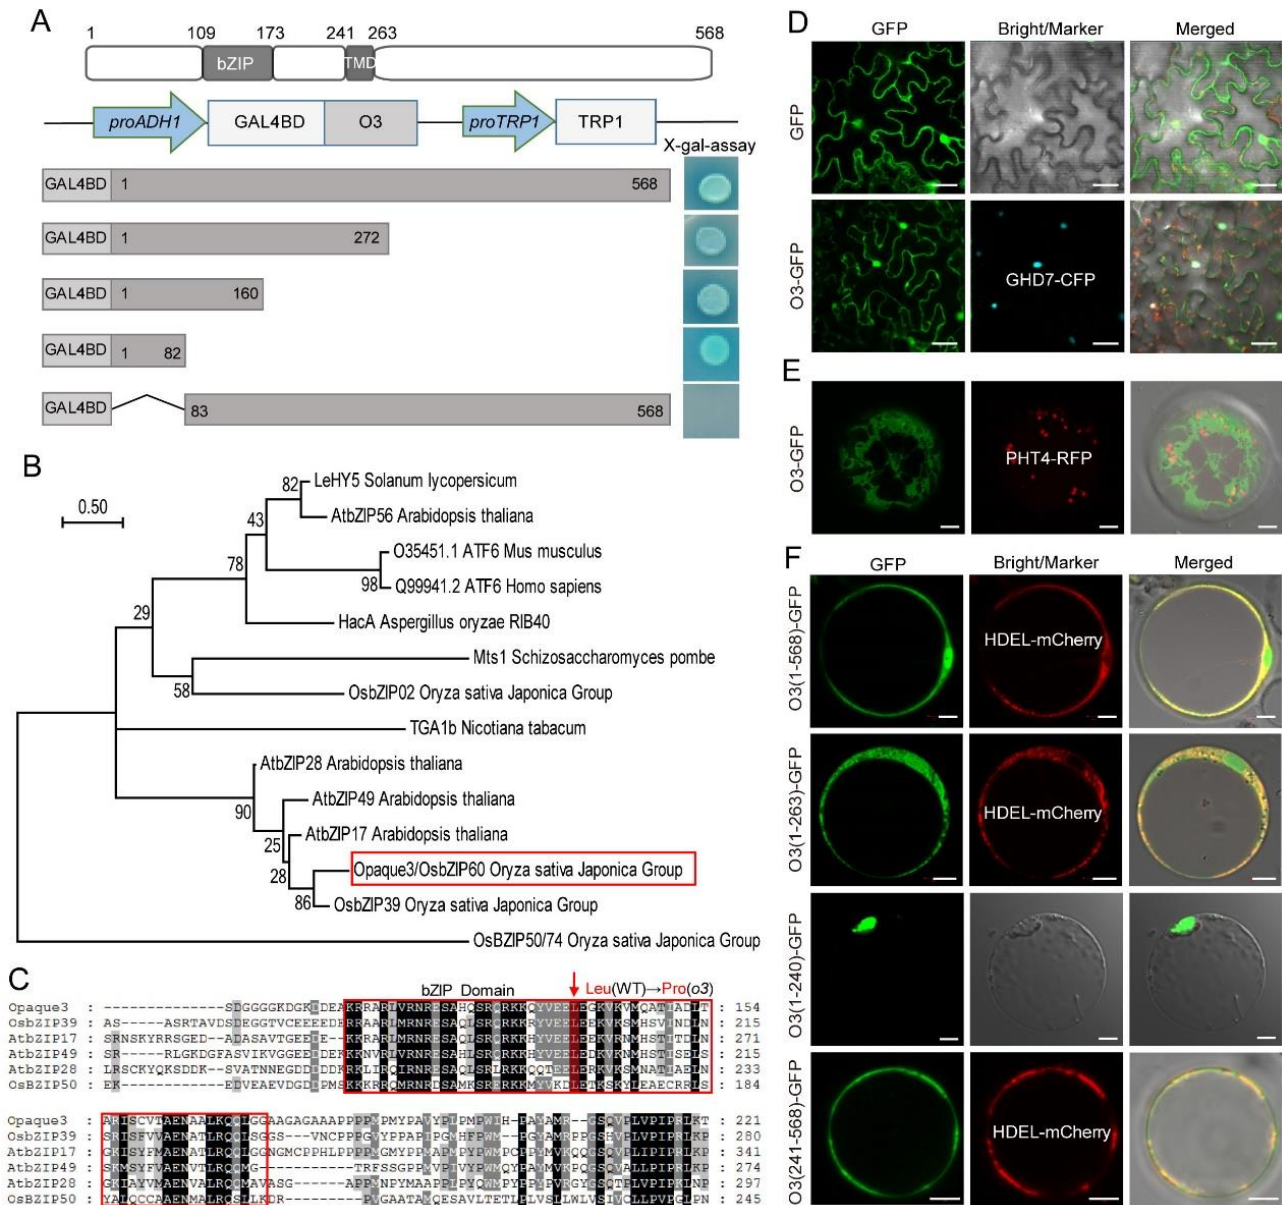

**Figure S7. Molecular biological characteristics of O3**

(A) Transactivation assay of different truncated form of O3. bZIP, TMD represented the basic zipper and transmembrane domain, respectively. Fusion proteins of the GAL4 DNA-binding domain and different portions of O3 were checked for their transactivation activity in yeast.

(B) Phylogenetic analysis of O3. The neighbor-joining tree was generated with MEGA7. Red box denotes the O3 in rice.

(C) Amino acid sequence alignment between part of O3 and other homologous proteins. It was generated with ClustalX2. White alphabet with black, grey background, and black alphabet with light grey background stands 100%, 80%, and 60% identity, respectively. Red box denotes the bZIP domain of O3 and other homologous proteins. Red arrow indicates the most conserved amino acid (lysine) of these homologous genes.

(D) Subcellular localization of O3-GFP in *N.benthamiana* leaves. O3-GFP is co-localized with GHD7-CFP in nucleus. Scale bars, 20 $\mu$ m.

(E) Subcellular localization of Full-length O3-GFP showing it is not co-localized with PHT4-RFP signal in Golgi. Scale bars, 5 $\mu$ m.

**(F)** Subcellular localization of different truncated forms of O3 in rice protoplast. O3<sup>1-240aa</sup>-GFP is only localized in nucleus. O3<sup>1-263aa</sup>-GFP and O3<sup>1-568aa</sup>-GFP are co-localized in nucleus and ER. O3<sup>241-568aa</sup>-GFP is only co-localized with HDEL-mCherry signal in ER. Scale bars, 5 $\mu$ m.

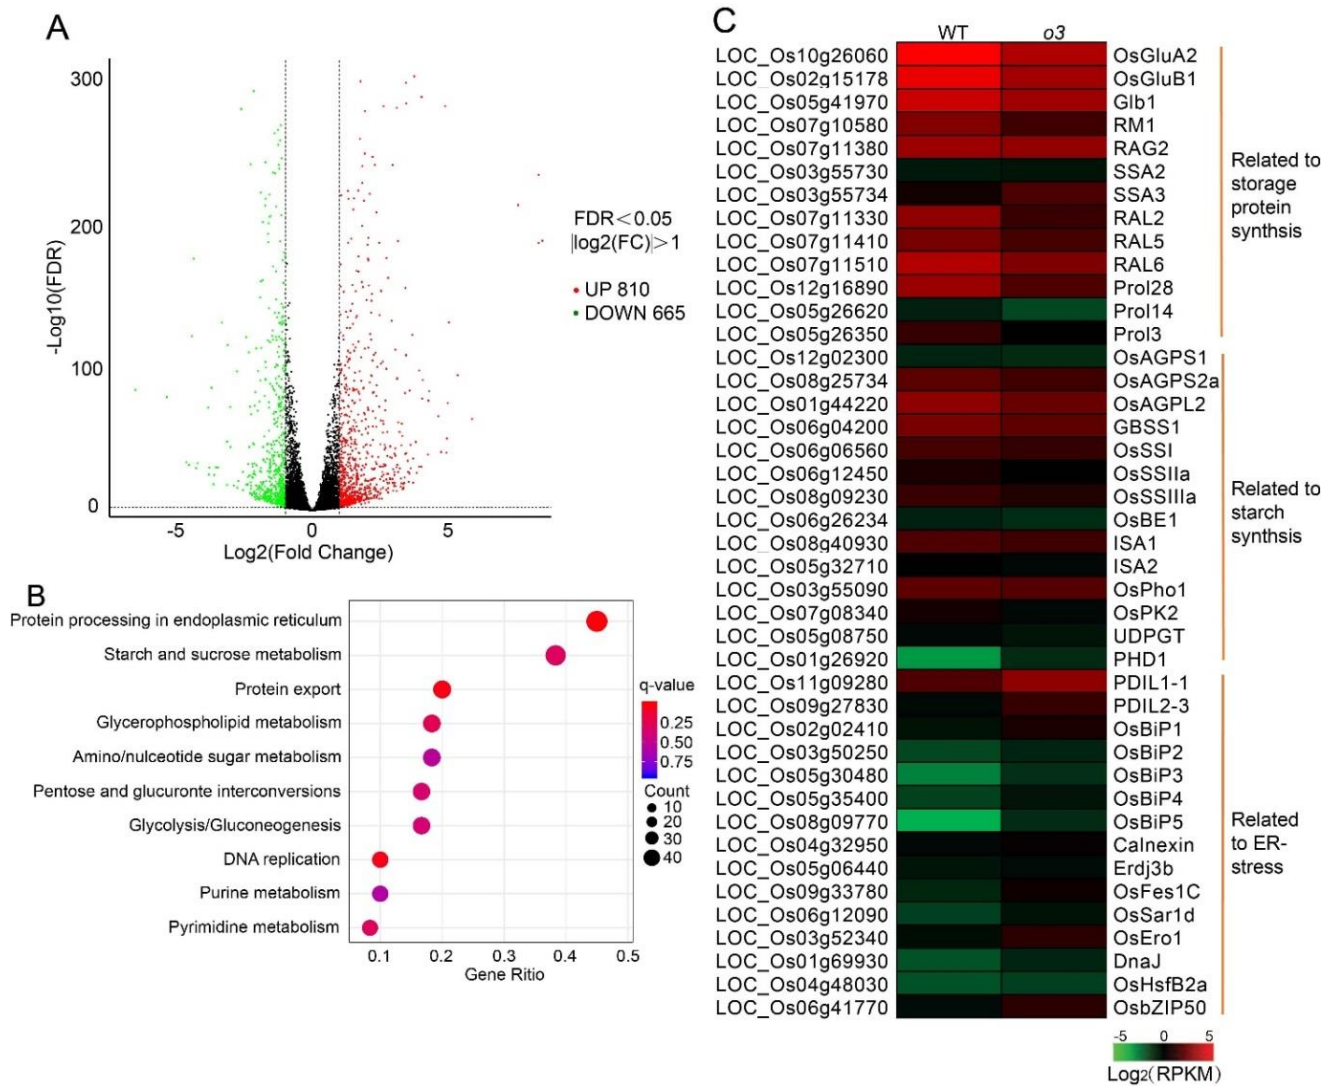

**Figure S8. RNA-seq analysis of wild type and *o3* using grains at 12 DAF.**

(A) Genes up- or down-regulated in RNA-seq data. A volcano plot of differential transcription levels between WT and *o3*. Green dots indicate reduced transcription level; red dots indicated increased transcription level; blue dots indicate no difference between WT and *o3*.

(B) GO enrichment terms for the 159 DEGs (differentially expressed genes) shared among the three groups.

(C) Heat map of the differentially regulated genes in WT and *o3* from RNA-seq. Genes related to ER stress were up-regulated while genes related to storage protein and starch synthesis were down-regulated. Data are shown as means  $\pm$ SD from three individual replicates.

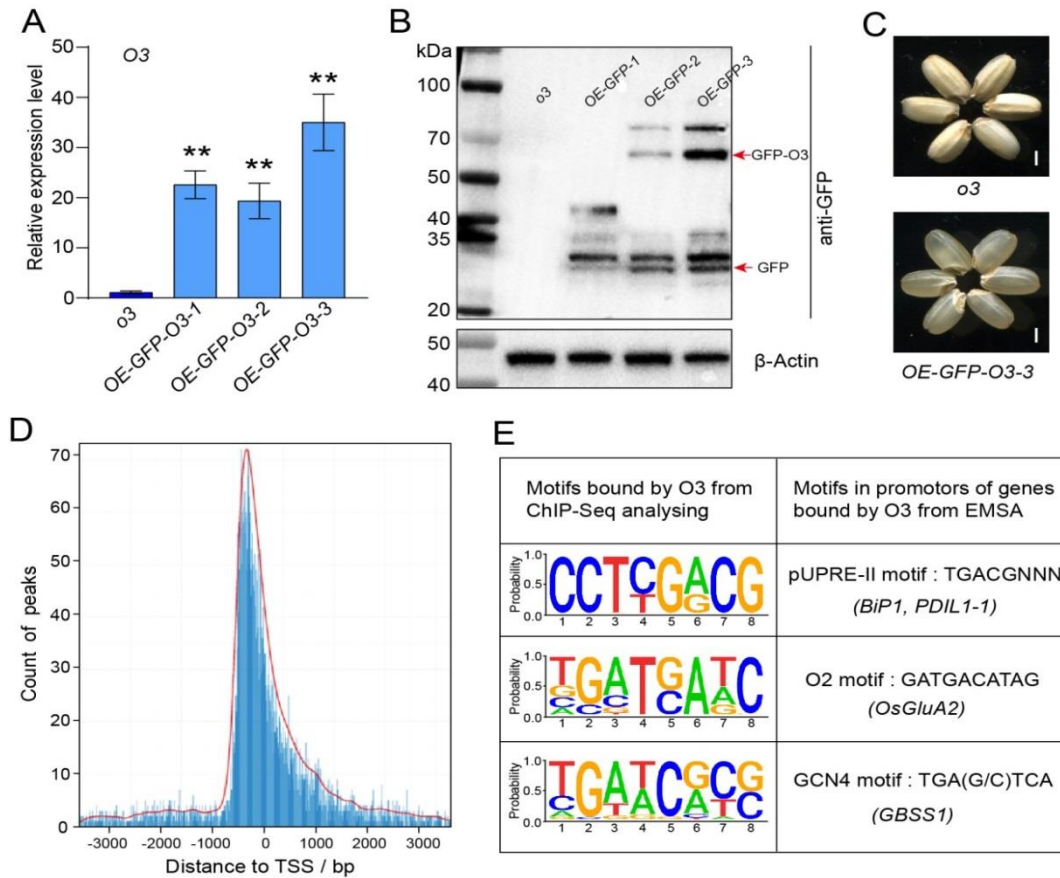

**Figure S9. ChIP-seq analysis in grains at 9 DAF from *GFP-O3* overexpression lines.**

**(A)** Relative expression level of *O3* in grains of *o3* mutant and *OE-GFP-O3* lines in *o3* background.

**(B)** The western blot detection of the GFP-O3 fusion protein level in 9-DAF grains of *o3* mutant and *OE-GFP-O3* overexpression lines using GFP antibodies.

**(C)** The appearance of mature grains of *o3* mutant and *OE-GFP-O3-3* line in *o3* background. *OE-GFP-O3-3* line was used for ChIP-seq. Scale bars, 1mm.

**(D)** Distribution of O3 binding peaks corresponding to the -3000bp to +3000bp region flanking the transcriptional start site (TSS).

**(E)** Three high-frequency motifs contained in the O3 binding peaks from ChIP-seq.

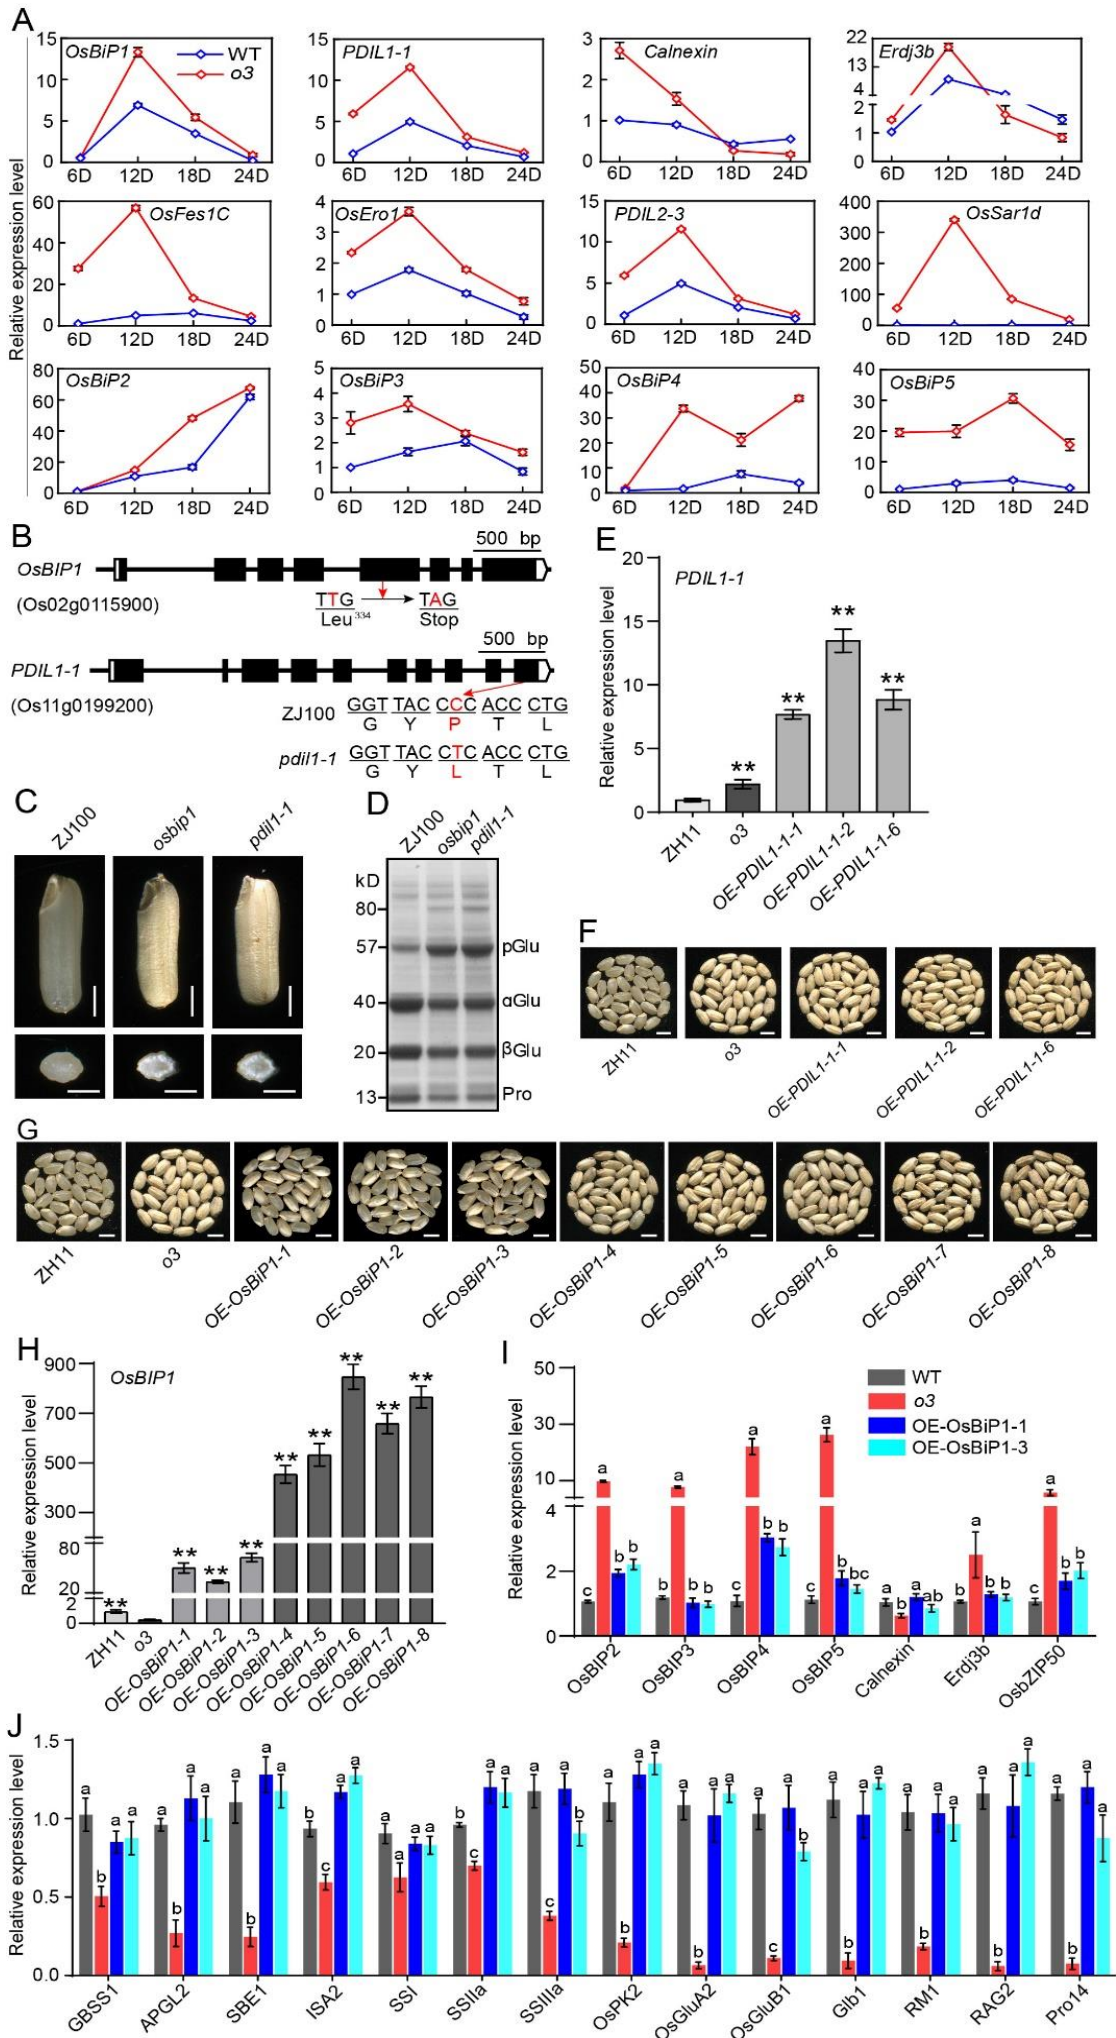

**Figure S10. The grains phenotype of *osbip1* and *pdil1-1* mutant in ZJ100 background**

**(A)** Relative expression level of genes (*OsBIP1*~*OsBIP5*, *PDIL1-1*, *PDIL2-3*, *Calnexin*, *Erdj3b*, *OsFes1C*, *OsEro1*, *OsSar1d*) related to ER stress in developing endosperm at 6, 12, 18, 24 days after fertilization.

**(B)** The mutation type of *OsBIP1* and *PDIL1-1* in ZhongJian100 (ZJ100) background.

**(C)** Grains appearance of *osbip1* and *pdil1-1* in ZJ100 background. Scale bars, 2mm.

**(D)** SDS-PAGE profiles of total dry-seed storage proteins of ZJ100, *osbip1*, and *pdil1-1* mutants. pGlu, 57-kDa proglutelins;  $\alpha$ Glu, 40-kDa glutelin acidic subunits;  $\beta$ Glu, 20-kDa glutelin basic subunits; Pro, prolamins.

**(E)** RT-qPCR analysis of *PDIL1-1* transcription level in transgenic over-expression lines in the *o3* mutant background (*OE-PDIL1-1*).

**(F)** Grains appearance of *OE-PDIL1-1* lines. Scale bars, 5mm.

**(G)** Grains appearance of *OsBIP1* over-expression lines in the *o3* mutant background (*OE-OsBIP1*). *OE-OsBIP1-1*~*3* could partly restore the transparent endosperm phenotype, but *OE-OsBIP1-4*~*8* failed to rescue the *o3* phenotype. Scale bars, 5mm.

**(H-J)** RT-qPCR analysis of *OsBIP1* (**H**), genes related to ER stress (**I**), and genes related to starch and protein biosynthesis (**J**) in *OE-PDIL1-1* lines.

Data in **(A, E, H-J)** are shown as means  $\pm$ SD from three individual replicates. Statistically significant differences were determined using Student's *t*-test (indicated with different lowercase letters ( $P < 0.05$ ), or \*  $P < 0.05$ ; \*\*,  $P < 0.01$ ).

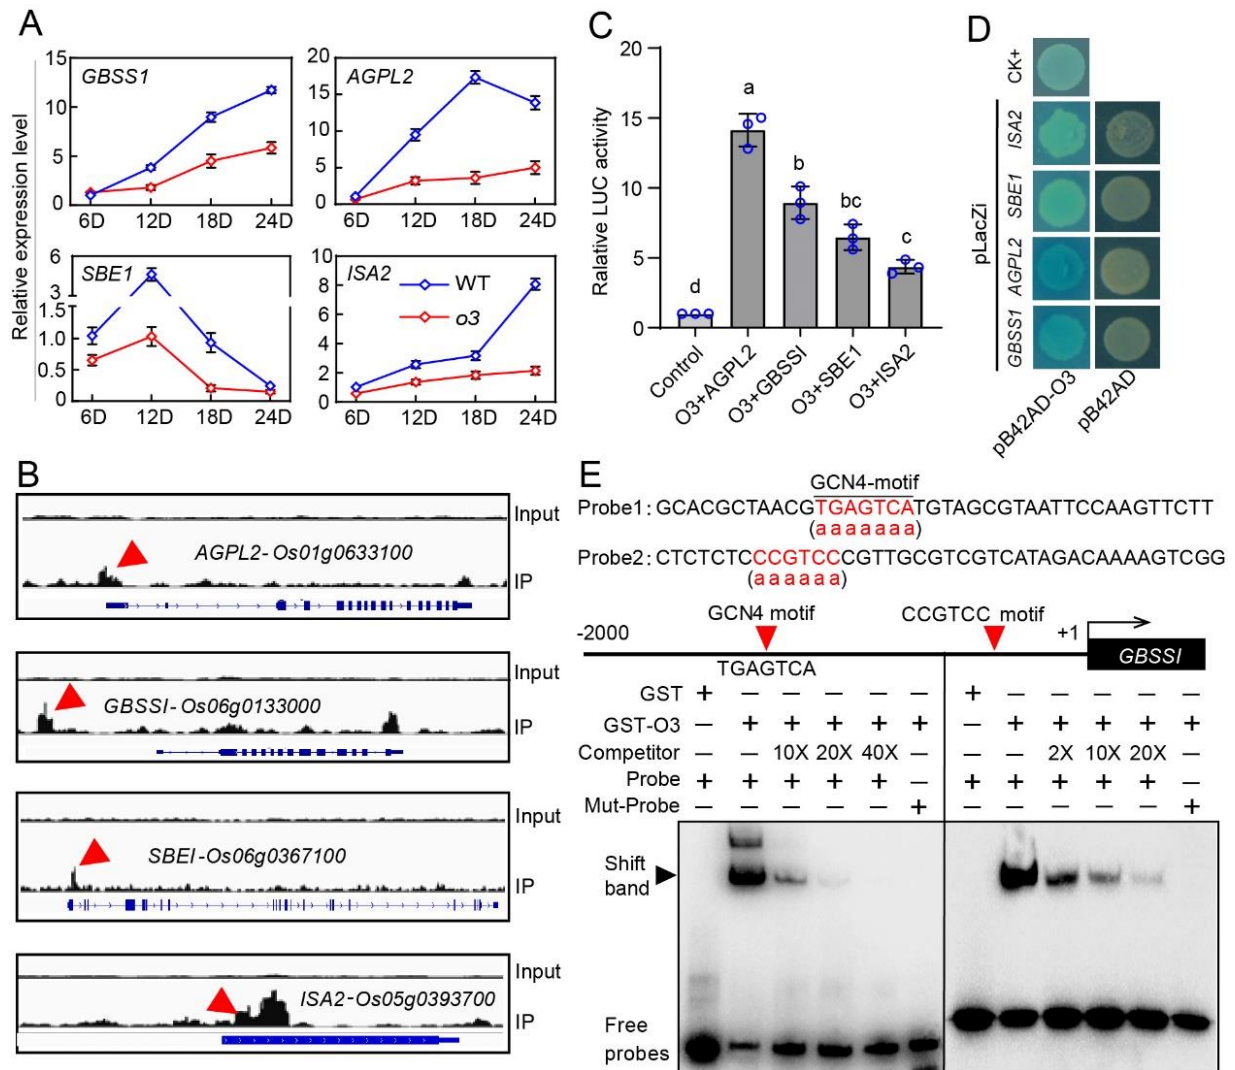

**Figure S11. O3 directly activate the transcription of genes related to starch synthesis.**

(A) RT-qPCR analysis of *GBSS1*, *AGPL2*, *SBE1*, and *ISA2* transcription level in developing endosperm at 6, 12, 18, 24 days after fertilization. Data are shown as means  $\pm$ SD (n=3).

(B) Chip-seq results showing the distributions of O3 binding sites for *GBSS1*, *AGPL2*, *SBE1*, and *ISA2* loci, as shown in Integrative Genomics Viewer. Red arrowhead indicates significant peaks calculated by MACS2, and the positions of peaks were shown in Attachment data II. Input sample was used as a negative control.

(C) Luciferase transient transactivation assay in rice protoplasts. O3 significantly activated the transcription of *GBSS1*, *AGPL2*, *SBE1* and *ISA2*. Data are shown as means  $\pm$ SD (n=3), significant difference was labeled with different letters according to Student's *t*-test.

(D) Yeast-one-hybrid assay showing the binding of O3 to the promotor of *GBSS1*, *AGPL2*, *SBE1*, *ISA2*.

(E) EMSA showed that O3 could bind to the probes of *GBSS1* with GCN4-motif (probe1, left) and CCGTCC-motif (probe2, right), the mutated motif in mut-probes was showed in bracket.



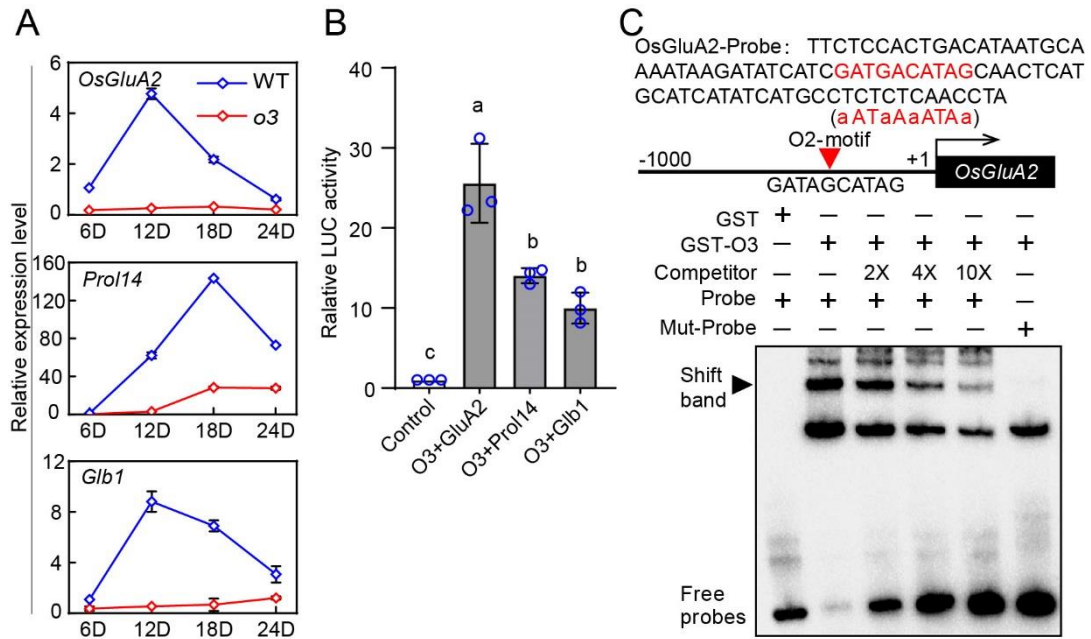

**Figure S12. O3 directly activate the expression of genes related to protein synthesis.**

**(A)** RT-qPCR analysis of *OsGluA2*, *Prol14*, and *Glb1* transcription level in developing endosperm at 6, 12, 18, 24 from 6~24 days after fertilization. Data are shown as means  $\pm$ SD (n=3).

**(B)** Luciferase transient transactivation assay in rice protoplasts. O3 significantly activated the transcription of *OsGluA2*, *Prol14*, and *Glb1*. Data are shown as means  $\pm$ SD (n=3), significant difference was labeled with different letters according to Student's *t*-test (n=3).

**(C)** EMSA showed that O3 could bind to the probes of *GBSS1* with O2-motif; the mutated motif in mut-probes was showed in bracket.

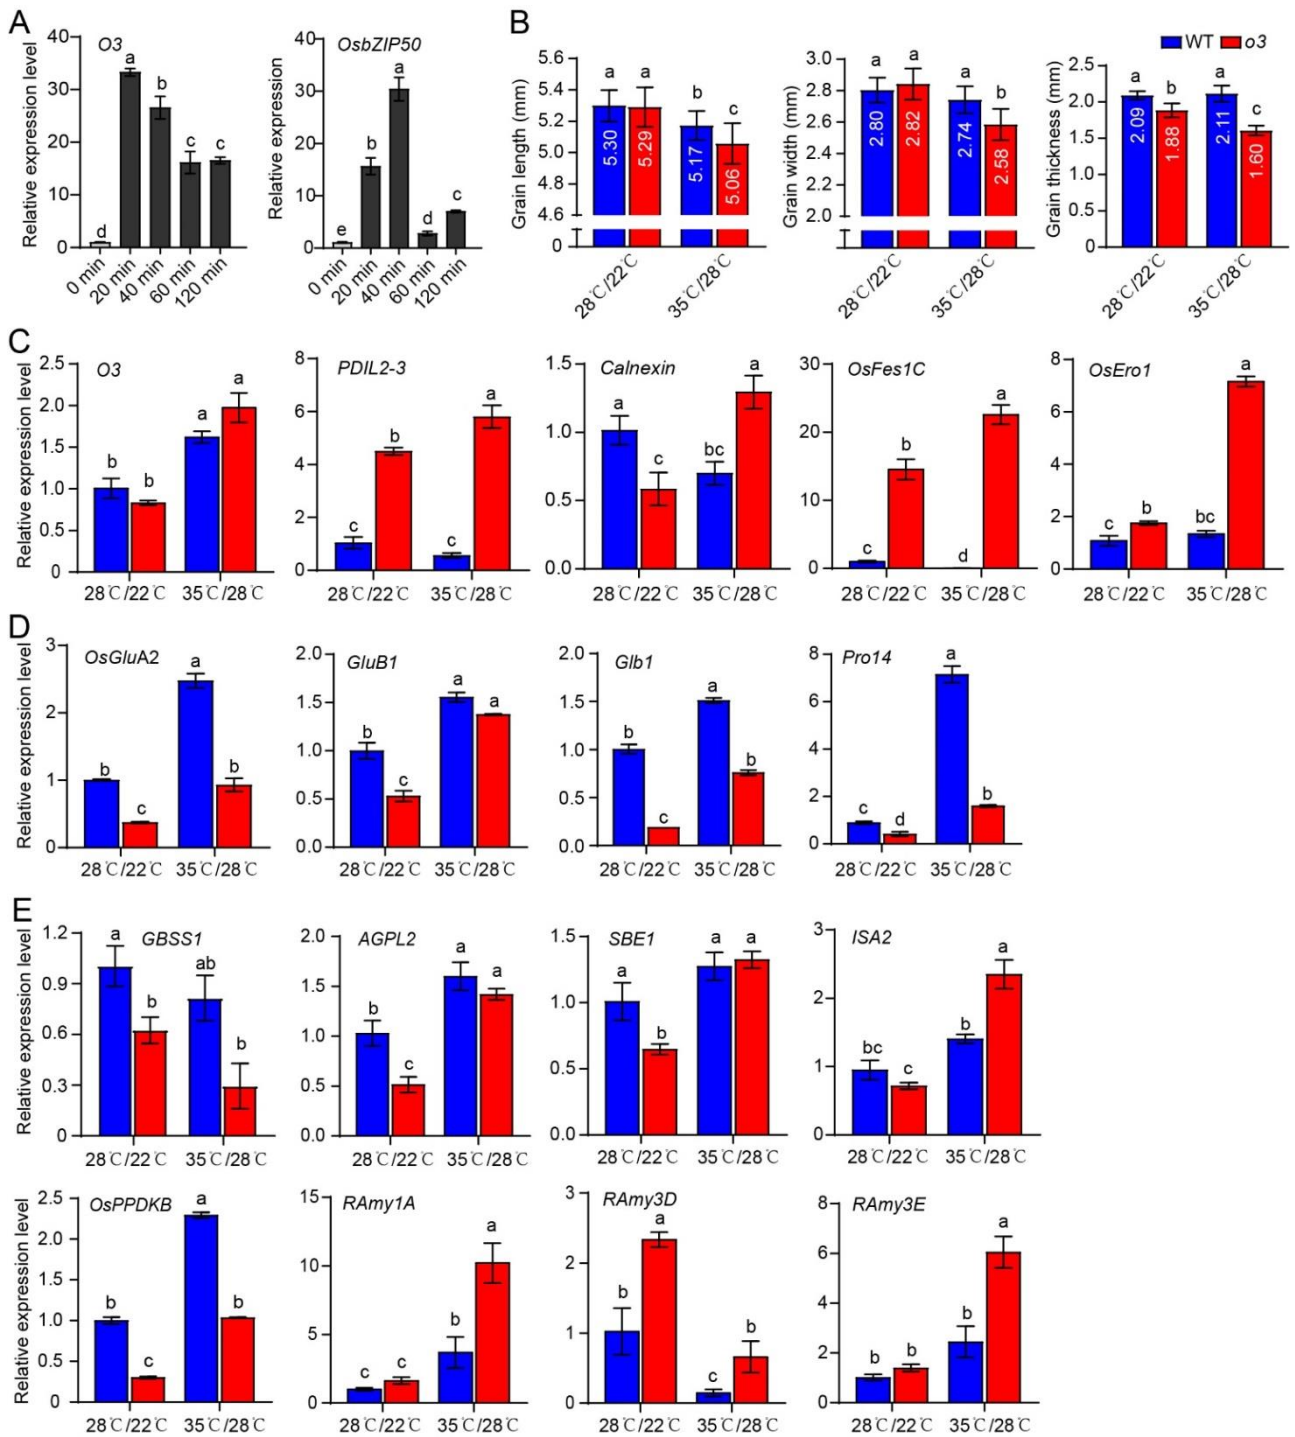

**Figure S13. *o3* undergo more serious ER stress under high-temperature conditions.**

**(A)** Relative expression level of *O3* and *OsbZIP50* in 2-week-old seedlings under heat stress treatment (42°C).

**(B)** Grain length, grain width and grain thickness of WT and *o3* under high-temperature treatment (35°C, 12h light /28°C, 12h, Dark) and normal-temperature treatment (28°C, 12h light /22°C, 12h, Dark).

**(C-E)** Relative expression levels of genes related to ER stress **(C)**, protein synthesis **(D)** and starch synthesis **(E)**.

Values are means  $\pm$  SD from three biological replicates. Significant difference was labeled with different letters according to Student's *t*-test.

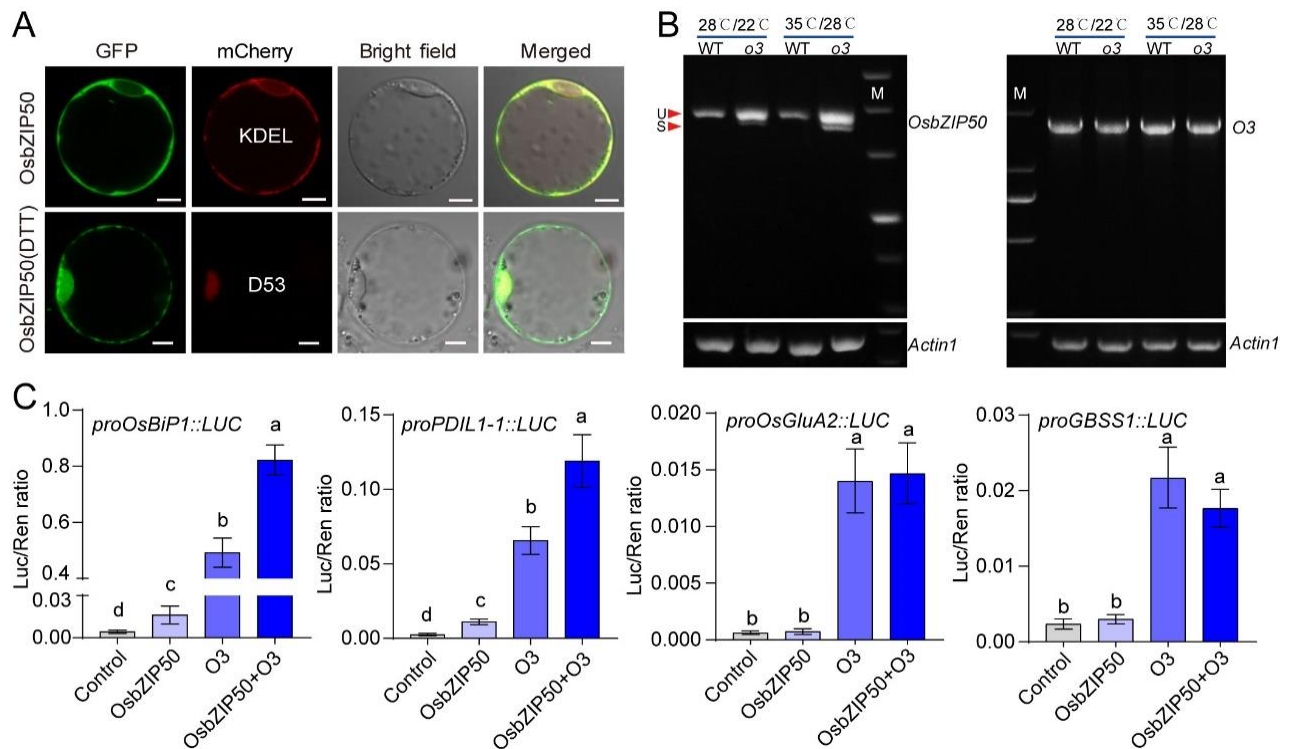

**Figure S14. OsbZIP50 can assist O3 in response to the ER stress.**

**(A)** Subcellular localization of OsbZIP50 in rice protoplast. OsbZIP50-GFP was localized in cytoplasm and co-localized with HDEL-mChery signal in ER. OsbZIP50-GFP was co-localized with DWARF53(D53)-mChery signal in nucleus after 2 hours Dithiothreitol (DTT) treatment. Scale bars, 5  $\mu$ m.

**(B)** The splicing forms of *OsbZIP50* and *O3* mRNA were detected in the wild type and *o3* mutant. The semi-quantitative RT-PCR analysis of *OsbZIP50* and *O3* transcripts in endosperm cells of WT and *o3* under high- and normal-temperature conditions. U, un-spliced form; S, spliced form.

**(C)** Transactivation assay of OsbZIP50 and O3 for *OsBIP1*, *PDIL1-1*, *OsGluA2*, and *GBSS1* in rice protoplasts. Luciferase reporter assay shows that OsbZIP50 can enhance the transient transactivation of *OsBIP1* and *PDIL1-1* together with O3. Values are means  $\pm$  SD from three biological replicates. Significant difference was labeled with different letters according to Student's *t*-test.

**Table S1. Primers used in this study**

|                            |                          |                                           |
|----------------------------|--------------------------|-------------------------------------------|
| Mapping                    | RM22097-F                | AAGAAATTCAAACACATGA                       |
|                            | RM22097-R                | AAAACATCTACTTTGATCCA                      |
|                            | RM22166-F                | TCCTTGTAATCTGGTCCC                        |
|                            | RM22166-R                | GTAGCCTAGCATGGTGCATG                      |
| Sequencing                 | 03-F                     | CGCACCTTCGCTCTCTTTCC                      |
|                            | 03-R                     | ACCTGCGAGCCACGCATTGC                      |
|                            | OsbZIP39-F               | ATGGCGGAGCCGGCCCTGCTG                     |
|                            | OsbZIP39-R               | GCACTTGGCCGCTCCGAGCT                      |
|                            | OsbZIP50-F               | GGCAACCCACCGGAGAGAC                       |
|                            | OsbZIP50-R               | CTCTCCCTCGATTTTCATGGC                     |
| Binary vector construction | 1300-O3-KpnI-F           | AATTCGAGCTCGGTACCAGGCGCAATTGCCTTATGAAG    |
|                            | 1300-O3-SalI-R           | GCATGCCTGCAGGTCGACTTGGAAACGCGAAAACCTCAG   |
|                            | RHV-O3-SacI-F            | GGATCCCCGGGTGAGCTCATGGCGGAGCCGGACCTACTC   |
|                            | RHV-O3-HindIII-R         | GCCGCACTAGTAAGCTTCAAGTGAGGGCTATGGCTTTTG   |
|                            | GUS-O3-EcoRI-F           | CCATGATTACGAATTCAGGAGTCCTGGTCATCTTCT      |
|                            | GUS-O3-NcoI-R            | CTCAGATCTACCATGGCCAGATCGTCGAGATCGAAA      |
| Crispr Cas9                | Crispr-O3-Target1-F      | ggcACCCCGACTTCCCGACCCTCG                  |
|                            | Crispr-O3-Target1-R      | aaacCGAGGGTCGGGAAGTCGGGG                  |
|                            | Crispr-O3-Target2-F      | ggcAGGGAGAGCGCGCACCAGTCCG                 |
|                            | Crispr-O3-Target2-R      | aaacCGACTGGTGCAGCTCTCCC                   |
|                            | Crispr-OsbZIP39-F        | ggcGGGCTCGAGTTCGACCTGCC                   |
|                            | Crispr-OsbZIP39-R        | aaacGGCAGGTCGAACTCGAGCC                   |
|                            | Crispr-OsbZIP50-F        | gttGAGTGAGGCGGGGGAAGCA                    |
|                            | Crispr-OsbZIP50-R        | aaacTGCTTCCCCCGCTCACT                     |
| Subcellular localization   | PAN580-O3-XbaI-F         | AGTCCGGAGCTAGCTCTAGAATGGCGGAGCCGGACCTACT  |
|                            | PAN580-O3-BamHI-R        | CCCTTGCTACCATGGATCCCAAGTGAGGGCTATGGCTTT   |
|                            | PAN580-O3(1-240)-BamHI-R | CCCTTGCTACCATGGATCCCTTCTTGGTCTTCCGGGCCTT  |
|                            | PAN580-O3(1-263)-BamHI-R | GTCCGGAGCTAGCTCTAGAAATCGGATGTATGGTGCAGCG  |
|                            | PAN580-OsbZIP50-XbaI-F   | AGTCCGGAGCTAGCTCTAGAATGACATGGCACATTC AAGC |
|                            | PAN580-OsbZIP50-BamHI-R  | CCCTTGCTACCATGGATCCGCAAGCAGCTGCTGCTAAAC   |
|                            | pYBA1132-O3-XbaI-F       | GGTGGCGCCGCTCTAGAATGGCGGAGCCGGACCTACT     |
|                            | pYBA1132-O3-KpnI-R       | CTTGCTACCATGGTACCAAGTGAGGGCTATGGCTTT      |
|                            | mCherry-D53-F            | AGCCCAGATCACTAGTATGCCCACTCCGGTGGCCGCC     |
|                            | mCherry-D53-R            | TGCTCACCATGGATCCACAATCTAGAATTATCTTTGGC    |
| Protein expression         | GST-O3-domain-F          | CGTGGATCCCCGGAATTCGGCAAGGATGGGAAGGATGAT   |
|                            | GST-O3-domain-R          | CGATGCGGCCGCTCGAGACCGGCGGCCACCCAATTG      |
| Chip-qPCR                  | Chip-OsBIP1-F1           | GGCCTGTTGAGATTGTTGCA                      |
|                            | Chip-OsBIP1-R1           | AAGGGTTGTTTCAGATTACTGT                    |
|                            | Chip-OsBIP1-F2           | ATTTGTGATGGCAAATCCACG                     |
|                            | Chip-OsBIP1-R2           | CTGGTCGGGACCCGTTTACT                      |
|                            | Chip-OsBIP1-F3           | ACGCCCAGTAAACGGGTCC                       |
|                            | Chip-OsBIP1-R3           | TATAAGGGGAGATGACTTGA                      |
|                            | Chip-OsBIP1-F4           | TCGCCACGAACCCATAAA                        |
|                            | Chip-OsBIP1-R4           | CCACCACCACACGCGCT                         |
|                            | Chip-PDIL1-1-F1          | CGATCGGGACCACCCGGTG                       |
|                            | Chip-PDIL1-1-R1          | GGATACGATAAAAGCTGTGT                      |
|                            | Chip-PDIL1-1-F2          | CTAATTTACCCGGATCCGGA                      |

|                         |                                         |                                                                                       |
|-------------------------|-----------------------------------------|---------------------------------------------------------------------------------------|
|                         | Chip-PDIL1-1-R2                         | CGACTACGTACACGTACCTG                                                                  |
|                         | Chip-PDIL1-1-F3                         | TGACGTGGCGTTGGCCGTCG                                                                  |
|                         | Chip-PDIL1-1-R3                         | ATGCCCCTGATGAGGAGTGA                                                                  |
|                         | Chip-PDIL1-1-F4                         | CCTCTAGTTTTAGCACATCTC                                                                 |
|                         | Chip-PDIL1-1-R4                         | CTGAGACGACACGCTTCTCA                                                                  |
| LUC assay               | None-O3-EcoR1-F                         | TAGAACTAGTGGATCCATGGCGGAGCCGGACCTACT                                                  |
|                         | None-O3-BamH1-R                         | GCTTGATATCGAATTCTTACAAGTGAGGGCTATGGCT                                                 |
|                         | 190LUC-AGPL2-F                          | GGCCAGTGCCAAGCTTCGTATGCCCTAGGTGCACCAAC                                                |
|                         | 190LUC-AGPL2-R                          | AGGGTCTTGCAGATCTTTGTGCACAAGCATTCTGATCC                                                |
|                         | 190LUC-SBE1-F                           | GGCCAGTGCCAAGCTTACATATGCCTTTGTGCCGGGA                                                 |
|                         | 190LUC-SBE1-R                           | AGGGTCTTGCAGATCTGGAGGAGGAAGAGGAGGTGAG                                                 |
|                         | 190LUC-ISA2-F                           | GGCCAGTGCCAAGCTTTAGATGGCCTCTAGGGTGTG                                                  |
|                         | 190LUC-ISA2-R                           | AGGGTCTTGCAGATCTCTTTTCGCACGGCTATTTTCG                                                 |
|                         | 190LUC-GBSS1-F                          | GGCCAGTGCCAAGCTTCCGCTGGCACCCGGAGGACTA                                                 |
|                         | 190LUC-GBSS1-R                          | AGGGTCTTGCAGATCTGTACGTCGCTCGCGTGTGCT                                                  |
|                         | 190LUC-OsBiP1-F                         | GGCCAGTGCCAAGCTTGGGCCTGTTGAGATTGTTGCAATT                                              |
|                         | 190LUC-OsBiP1-R                         | AGGGTCTTGCAGATCTACGCGCATCCGCGAACCCGAT                                                 |
|                         | 190LUC-PDIL1-1-F                        | GGCCAGTGCCAAGCTT CGGATCTGCCATCTGTGACT                                                 |
|                         | 190LUC-PDIL1-1-R                        | AGGGTCTTGCAGATCTGAGACGACACGCTTCTCACA                                                  |
|                         | 190LUC-GluA2-F                          | GGCCAGTGCCAAGCTTTGCTACAACCTACCAGTCCA                                                  |
|                         | 190LUC-GluA2-R                          | AGGGTCTTGCAGATCTCCATCGACAAGAGGAACAA                                                   |
|                         | 190LUC-Glb1-F                           | GGCCAGTGCCAAGCTTTAGCCATTGCACATGGAGTT                                                  |
|                         | 190LUC-Glb1-R                           | AGGGTCTTGCAGATCTCGACCTTGTAGCCATTGAT                                                   |
|                         | 190LUC-Pro114-F                         | GGCCAGTGCCAAGCTTCAAAGAATAGGTCAATTCCACCCA                                              |
| 190LUC-Pro114-R         | AGGGTCTTGCAGATCTATAGCAAGGAGAGCAAAGACGAA |                                                                                       |
| Yeast one-hybrid assays | pB42AD-O3-EcoRI-F                       | TGCCTCTCCGAATTCATGGAGCACGTGTTCCCGTC                                                   |
|                         | pB42AD-O3-EcoRI-R                       | CGAGTCGGCCGAATTCCTACTGAAGCTCCATGTTGAC                                                 |
|                         | pLacZi-GBSS1-XhoI-F                     | ATCTGTGCACCTCGAGCCCTTTGTGCAGGCGTTAGT                                                  |
|                         | pLacZi-GBSS1-XhoI-R                     | GAGCACATGCCTCGAGACACATTTTACCCGGTCCCC                                                  |
|                         | pLacZi-AGPL2-F                          | GAGCACATGCCTCGAGTCTATAGAGGGGAAGGCTGCA                                                 |
|                         | pLacZi-AGPL2-R                          | GAGCACATGCCTCGAGAAGCTGGTGGACAGGTAGATC                                                 |
|                         | pLacZi-SBE1-F                           | GAGCACATGCCTCGAGACATATGCCTTTGTGCCGGGA                                                 |
|                         | pLacZi-SBE1-R                           | GAGCACATGCCTCGAG AGGCTCATTAGATTCTGCTCTCGCA                                            |
|                         | pLacZi-ISA2-F                           | GAGCACATGCCTCGAGTAGATGGCCTCTAGGGTGTG                                                  |
|                         | pLacZi-ISA2-R                           | GAGCACATGCCTCGAG CTTTTTCGCACGGCTATTTTCG                                               |
| EMSA                    | EMSA-OsBIP1-F                           | TGGTCCAGGTCAGACTCATGACGTCCC GGCCAACGCGACG                                             |
|                         | EMSA-OsBIP1-R                           | CGTCGCGTTGGCCGGGACGTCATGAGTCTGACCTGGACCA                                              |
|                         | EMSA-PDIL1-F                            | AGCCTCGTGGAGGGATGATTTGACGATGATAAGTACAGGG                                              |
|                         | EMSA-PDIL1-R                            | CCCTGTACTTATCATCGTCAAATCATCCCTCCACGAGGCT                                              |
|                         | EMSA-GBSS1-F                            | GCACGCTAACGTGAGTCATGTAGCGTAATTCCAAGTTCTT                                              |
|                         | EMSA-GBSS1-R                            | AAGAACTTGAATTACGCTACATGACTCACGTTAGCGTGC                                               |
|                         | EMSA-GBSS1-F1                           | CTCTCTCCCGTCCC GTTGCGTGTCATAGACAAAAGTCCGG                                             |
|                         | EMSA-GBSS1-R1                           | CCGACTTTTGTCTATGACGACGCAACGGGACGGGAGAGAG                                              |
|                         | EMSA-OsGluA2-F                          | TTCTCCACTGACATAATGCAAAAATAAGATATCATCGATGACATAG<br>CAACTCATGCATCATATCATGCCTCTCTCAACCTA |
|                         | EMSA-OsGluA2-R                          | TAGGTTGAGAGAGGCATGATATGATGCATGAGTTGCTATGTCATC<br>GATGATATCTTATTTTGCATTATGTCAGTGGAGAA  |
| qRT-PCR                 | Ubiquitin-F                             | TGGTCAGTAATCAGCCAGTTTGG                                                               |

|             |                           |
|-------------|---------------------------|
| Ubiquitin-R | GCACCACAAATACTTGACGAACAG  |
| q-SSI-F     | GGGCCTTCATGGATCAACC       |
| q-SSI-R     | CCGCTTCAAGCATCCTCATC      |
| q-SSIIa-F   | GCTTCCGGTTTGTGTGTCA       |
| q-SSIIa-R   | CTTAATACTCCCTCAACTCCACCAT |
| q-SSIIIa-F  | GCCTGCCCTGGACTACATTG      |
| q-SSIIIa-R  | GCAAACATATGTACACGGTTCTGG  |
| q-SSIVa-F   | GGGAGCGGCTCAAACATAAA      |
| q-SSIVa-R   | CCGTGCACTGACTGCAAAAT      |
| q-GBSSI-F   | AACGTGGCTGCTCCTTGAA       |
| q-GBSSI-R   | TTGGCAATAAGCCACACACA      |
| q-AGPL1-F   | GGAAGACGGATGATCGAGAAAG    |
| q-AGPL1-R   | CACATGAGATGCACCAACGA      |
| q-AGPL2-F   | AGTTCGATTCAAGACGGATAGC    |
| q-AGPL2-R   | CGACTTCCACAGGCAGCTTATT    |
| q-AGPS1-F   | GTGCCACTTAAAGCACCATT      |
| q-AGPS1-R   | CCCACATTCAGACACGGTTT      |
| q-AGPS2b-F  | AACAATCGAAGCGCGAGAAA      |
| q-AGPS2b-R  | GCCTGTAGTTGGCACCCAGA      |
| q-SBEI-F    | TGGCCATGGAAGAGTTGGC       |
| q-SBEI-R    | CAGAAGCAACTGCTCCACC       |
| q-ISA2-F    | ATGCCAATGCCGTTTCTCTC      |
| q-ISA2-R    | GTGGATGTACGGATCGAGGT      |
| q-PUL-F     | ACCTTTCTTCCATGCTGG        |
| q-PUL-R     | CAAAGGTCTGAAAGATGGG       |
| q-PHOL-F    | TTGGCAGGAAGTTTCGCT        |
| q-PHOL-R    | CGAAGCCTGAAGTGAACCTTGCT   |
| q-GluA2-F   | ACAAGAGAAGGATGTGCTTAC     |
| q-GluA2-R   | ATTCTTTATCCGCATTGCCAAC    |
| q-GluB1-F   | CAAGACAAACGCTAACGCCTTC    |
| q-GluB1-R   | TCGATAATCCTGGGTAGTATTG    |
| q-GluD-F    | AAAGACAATTTCCGACCCTACG    |
| q-GluD-R    | TTAGGAAGTGGTAACCCCGCTG    |
| q-Glb1-F    | AGGTTCCAGCCGATGTTCC       |
| q-Glb1-R    | CATGCTCTCCTCGTAGCTCCTC    |
| q-RM1-F     | TTGTGCAGCAACTACAGCTG      |
| q-RM1-R     | CGGAGCAATGTAGTAGTTAG      |
| q-Pro14-F   | ACAACCTCCAGCAGTTTGGTG     |
| q-Pro14-R   | CAAGGGTGGTAATGGTACTG      |
| q-RP10-F    | CAGTTGCCAGATGATGCAGAG     |
| q-RP10-R    | TCAACAACAACCACAGGAAGAGA   |
| q-RAG1-F    | GTTCTCGGTATTGCTCCTCGT     |
| q-RAG1-R    | GGCTGTAGACTTGGTGGTGGT     |
| q-OsBiP1-F  | TGGAAAGCTGAGGAGGGAAG      |
| q-OsBiP1-R  | CTTGACAGGTCCCATGGTCT      |
| q-OsBiP2-F  | ATCTCCCGTACAAGGTGGTG      |
| q-OsBiP2-R  | CTCGGCTGTCTCCTTCATCT      |
| q-OsBiP3-F  | TACGTCTACGGCGTCAAGAA      |

|         |              |                      |
|---------|--------------|----------------------|
|         | q-OsBiP3-R   | GGAGCTTCTCCTCGTACTCC |
|         | q-OsBiP4-F   | ATGGACCACTTCGTCAAGGT |
|         | q-OsBiP4-R   | GTCGAACAGGGACTCGATCT |
|         | q-OsBiP5-F   | AGAGCATGATCCTCCTCGAC |
|         | q-OsBiP5-R   | CGTCTGCTGTGCCTTGTACG |
|         | q-Calnexin-F | AGGAGCTTGATGAGCCTGTT |
|         | q-Calnexin-R | CTCAAGGCCATTCTGAAGCC |
|         | q-PDIL1-1-F  | GTGCTGCTGAGGAGTTCAAG |
|         | q-PDIL1-1-R  | CCTCAGCCCAAAGTACTGGA |
|         | q-PDIL2-3-F  | GCAAGTTGGAGTTGGTGGTT |
|         | q-PDIL2-3-R  | GGGTACCGTCCAAAGGAAGA |
|         | q-ERdj3B-F   | TCATAAAGCCAGCACCAGGA |
|         | q-ERdj3B-R   | CAGACCTGCTCGGTCATTTG |
|         | q-SDF2-F     | GGTTGCGCCATGTTGATACT |
|         | q-SDF2-R     | TACCTCTTGCTGTCCACCAG |
|         | q-Ero1-F     | TGTGTCGGCTTAGGGATTGT |
|         | q-Ero1-R     | GGCTTCTTGAATGGCTCAGG |
|         | q-Fes1C-F    | AAAGAACAGGCAGAGGGTGT |
|         | q-Fes1C-R    | TGCCGATCCTCCAGTCAAAT |
|         | q-Sar1d-F    | GAGCAGGAGCTGTGCTACTA |
|         | q-Sar1d-R    | TGACATCCACCTGAAGCCAT |
|         | q-OsbZIP50-F | GGAAGGAGAATGAGGTGGCT |
|         | q-OsbZIP50-R | TCCCTCGATTTCATGGCAGA |
|         | q-OsbZIP39-F | TCCAAGGGAGGCTGGTAATG |
|         | q-OsbZIP39-R | GGAGCTCTTGAAAGGAAGCG |
| semi-RT | RT-Actin1-F  | CCAAGGCCAATCGTGAGAAG |
|         | RT-Actin1-R  | AAGGAAGGCTGGAAGAGGAC |
|         | OsbZIP50-S-F | GAGCAAGAAGAAGAGGAGGC |
|         | OsbZIP50-S-F | CTTCTTTCCGGTTACCGTCG |
